# Supplementary material for: Contribution of Soil and Litter Nutrient Characteristics to Plant Nutrients in a Natural Secondary Mixed Forest in the Qinling Mountains, China
Source: Research Square preprint supplement (doi:10.21203/rs.3.rs-372614/v1), 2021-04-26
Supplement: Supplementary file 1 [file eb2504c10b313a4279c2c161.xlsx]

## Sheet: Sheet1
Journal:Environmental Science and Pollution Research
Title:Response of multi-ecological component stoichiometry and tree nutrient resorption to whole-tree harvesting in secondary forests in the Qinling Mountains, China
Yue Pang ·Jing Tian ·Lanxin Liu ·Lina Han ·Dexiang Wang(✉)
College of Forestry, Northwest A&F University, Yangling, 712100, Shaanxi, China
Correspondence：Dexiang Wang, E-mail: wangdx66@sohu.com
Address: College of Forestry, Northwest A&F University, 712100, Yangling, China.
Tel.: +86-029-87080202; Fax: +86-029-87080202.
Table S1. Allometric equations for biomass calculation
Note: W, the dry biomass (kg) of a tree component (e.g. stem, bark, branch, leaf and root);
D, diameter at breast height for tree (cm); H, height of tree (m)
Species	Organ	Allometric biomass equation	Correlation coefficient (R)	Species suitable for model	Source
Ouercus aliena var. auteserrata	Stem	lnWS=0.99253ln(D2H)-3.78818	0.99763	Ouercus aliena var. auteserrata in Huoditang Experimental Forest Farm	Chen, C., & Peng, H. (1996). The present stock and productivity of main forest types in Huoditang forest area of Qinling Mountains. Journal of Northwest Forestry College, 11, 92-102.
Ouercus aliena var. auteserrata	Bark	lnWBA=0.75632(D2H)-3.9245	0.99708	Ouercus aliena var. auteserrata in Huoditang Experimental Forest Farm	Chen, C., & Peng, H. (1996). The present stock and productivity of main forest types in Huoditang forest area of Qinling Mountains. Journal of Northwest Forestry College, 11, 92-103.
Ouercus aliena var. auteserrata	Branches	lnWB=3.49934lnD-6.50726	0.96524	Ouercus aliena var. auteserrata in Huoditang Experimental Forest Farm	Chen, C., & Peng, H. (1996). The present stock and productivity of main forest types in Huoditang forest area of Qinling Mountains. Journal of Northwest Forestry College, 11, 92-104.
Ouercus aliena var. auteserrata	Leaf	lnWL=2.29344InD-4.88581	0.97832	Ouercus aliena var. auteserrata in Huoditang Experimental Forest Farm	Chen, C., & Peng, H. (1996). The present stock and productivity of main forest types in Huoditang forest area of Qinling Mountains. Journal of Northwest Forestry College, 11, 92-105.
Ouercus aliena var. auteserrata	Root	lnWR=2.76435InD-4.20817	0.99106	Ouercus aliena var. auteserrata in Huoditang Experimental Forest Farm	Chen, C., & Peng, H. (1996). The present stock and productivity of main forest types in Huoditang forest area of Qinling Mountains. Journal of Northwest Forestry College, 11, 92-106.
Pinus tabuliformis	Stem	lnWS=1.04086In(D2H)-4.63143	0.99558	Pinus tabuliformisin Huoditang Experimental Forest Farm	Chen, C., & Peng, H. (1996). The present stock and productivity of main forest types in Huoditang forest area of Qinling Mountains. Journal of Northwest Forestry College, 11, 92-107.
Pinus tabuliformis	Bark	InWBA=0.77396In(D2H)-4.69348	0.99037	Pinus tabuliformisin Huoditang Experimental Forest Farm	Chen, C., & Peng, H. (1996). The present stock and productivity of main forest types in Huoditang forest area of Qinling Mountains. Journal of Northwest Forestry College, 11, 92-108.
Pinus tabuliformis	Branches	InWB=2.57733InD-4.08026	0.99159	Pinus tabuliformisin Huoditang Experimental Forest Farm	Chen, C., & Peng, H. (1996). The present stock and productivity of main forest types in Huoditang forest area of Qinling Mountains. Journal of Northwest Forestry College, 11, 92-109.
Pinus tabuliformis	Leaf	InWL=2.57495InD-5.11712	0.98652	Pinus tabuliformisin Huoditang Experimental Forest Farm	Chen, C., & Peng, H. (1996). The present stock and productivity of main forest types in Huoditang forest area of Qinling Mountains. Journal of Northwest Forestry College, 11, 92-110.
Pinus tabuliformis	Root	lnWR=2.28692InD-4.14198	0.98792	Pinus tabuliformisin Huoditang Experimental Forest Farm	Chen, C., & Peng, H. (1996). The present stock and productivity of main forest types in Huoditang forest area of Qinling Mountains. Journal of Northwest Forestry College, 11, 92-111.
Pinus armandii	Stem	lnWS=1.02363In(D2H)-4.49970	0.99802	Pinus armandiiin Huoditang Experimental Forest Farm	Chen, C., & Peng, H. (1996). The present stock and productivity of main forest types in Huoditang forest area of Qinling Mountains. Journal of Northwest Forestry College, 11, 92-112.
Pinus armandii	Bark	InWBA=0.88417In(D2H)-5.38472	0.99698	Pinus armandiiin Huoditang Experimental Forest Farm	Chen, C., & Peng, H. (1996). The present stock and productivity of main forest types in Huoditang forest area of Qinling Mountains. Journal of Northwest Forestry College, 11, 92-113.
Pinus armandii	Branches	InWB=2.57551InD-4.08452	0.98656	Pinus armandiiin Huoditang Experimental Forest Farm	Chen, C., & Peng, H. (1996). The present stock and productivity of main forest types in Huoditang forest area of Qinling Mountains. Journal of Northwest Forestry College, 11, 92-114.
Pinus armandii	Leaf	InWL=2.75687InD-5.75891	0.98004	Pinus armandiiin Huoditang Experimental Forest Farm	Chen, C., & Peng, H. (1996). The present stock and productivity of main forest types in Huoditang forest area of Qinling Mountains. Journal of Northwest Forestry College, 11, 92-115.
Pinus armandii	Root	lnWR=0.97120In(D2H)-5.26301	0.97927	Pinus armandiiin Huoditang Experimental Forest Farm	Chen, C., & Peng, H. (1996). The present stock and productivity of main forest types in Huoditang forest area of Qinling Mountains. Journal of Northwest Forestry College, 11, 92-116.
Betula albosinensis	Stem	lnWS=0.91035In(D2H)-3.79326	0.99721	Betula albosinensisin Huoditang Experimental Forest Farm	Chen, C., & Peng, H. (1996). The present stock and productivity of main forest types in Huoditang forest area of Qinling Mountains. Journal of Northwest Forestry College, 11, 92-117.
Betula albosinensis	Bark	InWBA=0.81021In(D2H)-4.27750	0.99674	Betula albosinensisin Huoditang Experimental Forest Farm	Chen, C., & Peng, H. (1996). The present stock and productivity of main forest types in Huoditang forest area of Qinling Mountains. Journal of Northwest Forestry College, 11, 92-118.
Betula albosinensis	Branches	InWB=3.35934lnD-5.93511	0.98584	Betula albosinensisin Huoditang Experimental Forest Farm	Chen, C., & Peng, H. (1996). The present stock and productivity of main forest types in Huoditang forest area of Qinling Mountains. Journal of Northwest Forestry College, 11, 92-119.
Betula albosinensis	Leaf	InWL=2.39007lnD-5.56930	0.98709	Betula albosinensisin Huoditang Experimental Forest Farm	Chen, C., & Peng, H. (1996). The present stock and productivity of main forest types in Huoditang forest area of Qinling Mountains. Journal of Northwest Forestry College, 11, 92-120.
Betula albosinensis	Root	InWR=2.68879InD-4.33607	0.99292	Betula albosinensisin Huoditang Experimental Forest Farm	Chen, C., & Peng, H. (1996). The present stock and productivity of main forest types in Huoditang forest area of Qinling Mountains. Journal of Northwest Forestry College, 11, 92-121.
Larix principis-rupprechtii	Stem	lnWS=0.99794In(D2H)-4.29251	0.99312	Larix principis-rupprechtiiin Huoditang Experimental Forest Farm	Chen, C., & Peng, H. (1996). The present stock and productivity of main forest types in Huoditang forest area of Qinling Mountains. Journal of Northwest Forestry College, 11, 92-122.
Larix principis-rupprechtii	Bark	InWBA=0.80398In(D2H)-4.53535	0.98872	Larix principis-rupprechtiiin Huoditang Experimental Forest Farm	Chen, C., & Peng, H. (1996). The present stock and productivity of main forest types in Huoditang forest area of Qinling Mountains. Journal of Northwest Forestry College, 11, 92-123.
Larix principis-rupprechtii	Branches	InWB=2.04597InD-2.55078	0.9772	Larix principis-rupprechtiiin Huoditang Experimental Forest Farm	Chen, C., & Peng, H. (1996). The present stock and productivity of main forest types in Huoditang forest area of Qinling Mountains. Journal of Northwest Forestry College, 11, 92-124.
Larix principis-rupprechtii	Leaf	InWL=1.90488InD-3.44704	0.97436	Larix principis-rupprechtiiin Huoditang Experimental Forest Farm	Chen, C., & Peng, H. (1996). The present stock and productivity of main forest types in Huoditang forest area of Qinling Mountains. Journal of Northwest Forestry College, 11, 92-125.
Larix principis-rupprechtii	Root	InWR=2.18625InD-3.46236	0.98725	Larix principis-rupprechtiiin Huoditang Experimental Forest Farm	Chen, C., & Peng, H. (1996). The present stock and productivity of main forest types in Huoditang forest area of Qinling Mountains. Journal of Northwest Forestry College, 11, 92-126.
Picea asperata	Stem	lnWS=0.9434ln(D2H)-3.9744	0.9858	Picea asperata and Abies fabri	Cheng, T. R., Qin yan, M. A., Feng, Z. K., & Luo, X. (2007). Research on forest biomass in Xiaolong Mountains,Gansu Province. Journal of Beijing Forestry University, 29(1), 31-36.
Picea asperata	Bark	lnWBA=0.893ln(D2H)-5.5587	0.9855	Picea asperata and Abies fabri	Cheng, T. R., Qin yan, M. A., Feng, Z. K., & Luo, X. (2007). Research on forest biomass in Xiaolong Mountains,Gansu Province. Journal of Beijing Forestry University, 29(1), 31-37.
Picea asperata	Branches	lnWB=0.9257ln(D2H)-4.635	0.955	Picea asperata and Abies fabri	Cheng, T. R., Qin yan, M. A., Feng, Z. K., & Luo, X. (2007). Research on forest biomass in Xiaolong Mountains,Gansu Province. Journal of Beijing Forestry University, 29(1), 31-38.
Picea asperata	Leaf	lnWL=0.9753ln(D2H)-5.9391	0.9848	Picea asperata and Abies fabri	Cheng, T. R., Qin yan, M. A., Feng, Z. K., & Luo, X. (2007). Research on forest biomass in Xiaolong Mountains,Gansu Province. Journal of Beijing Forestry University, 29(1), 31-39.
Picea asperata	Root	lnWR=0.9457ln(D2H)-5.2791	0.9919	Picea asperata and Abies fabri	Cheng, T. R., Qin yan, M. A., Feng, Z. K., & Luo, X. (2007). Research on forest biomass in Xiaolong Mountains,Gansu Province. Journal of Beijing Forestry University, 29(1), 31-40.
Populus davidiana	Stem	lnWS=0.9631ln(D2H)-3.8023	0.9919	Populus davidiana	Cheng, T. R., Qin yan, M. A., Feng, Z. K., & Luo, X. (2007). Research on forest biomass in Xiaolong Mountains,Gansu Province. Journal of Beijing Forestry University, 29(1), 31-41.
Populus davidiana	Bark	lnWBA=0.9682ln(D2H)-5.833	0.9561	Populus davidiana	Cheng, T. R., Qin yan, M. A., Feng, Z. K., & Luo, X. (2007). Research on forest biomass in Xiaolong Mountains,Gansu Province. Journal of Beijing Forestry University, 29(1), 31-42.
Populus davidiana	Branches	lnWB=1.0903ln(D2H)-5.907	0.943	Populus davidiana	Cheng, T. R., Qin yan, M. A., Feng, Z. K., & Luo, X. (2007). Research on forest biomass in Xiaolong Mountains,Gansu Province. Journal of Beijing Forestry University, 29(1), 31-43.
Populus davidiana	Leaf	lnWL=0.6104ln(D2H)-3.9108	0.791	Populus davidiana	Cheng, T. R., Qin yan, M. A., Feng, Z. K., & Luo, X. (2007). Research on forest biomass in Xiaolong Mountains,Gansu Province. Journal of Beijing Forestry University, 29(1), 31-44.
Populus davidiana	Root	lnWR=0.7692ln(D2H)-3.2756	0.9815	Populus davidiana	Cheng, T. R., Qin yan, M. A., Feng, Z. K., & Luo, X. (2007). Research on forest biomass in Xiaolong Mountains,Gansu Province. Journal of Beijing Forestry University, 29(1), 31-45.
Other broad leaf species	Stem	lnWS=0.9803ln(D2H)-3.8852	0.9844	Fraxinus mandschurica, Acer sp., Tilia sp. and so on	Cheng, T. R., Qin yan, M. A., Feng, Z. K., & Luo, X. (2007). Research on forest biomass in Xiaolong Mountains,Gansu Province. Journal of Beijing Forestry University, 29(1), 31-46.
Other broad leaf species	Bark	lnWBA=0.7713ln(D2H)-4.448	0.914	Fraxinus mandschurica, Acer sp., Tilia sp. and so on	Cheng, T. R., Qin yan, M. A., Feng, Z. K., & Luo, X. (2007). Research on forest biomass in Xiaolong Mountains,Gansu Province. Journal of Beijing Forestry University, 29(1), 31-47.
Other broad leaf species	Branches	lnWB=1.0851ln(D2H)-5.6360	0.8869	Fraxinus mandschurica, Acer sp., Tilia sp. and so on	Cheng, T. R., Qin yan, M. A., Feng, Z. K., & Luo, X. (2007). Research on forest biomass in Xiaolong Mountains,Gansu Province. Journal of Beijing Forestry University, 29(1), 31-48.
Other broad leaf species	Leaf	lnWL=0.7377ln(D2H)-4.5320	0.8705	Fraxinus mandschurica, Acer sp., Tilia sp. and so on	Cheng, T. R., Qin yan, M. A., Feng, Z. K., & Luo, X. (2007). Research on forest biomass in Xiaolong Mountains,Gansu Province. Journal of Beijing Forestry University, 29(1), 31-49.
Other broad leaf species	Root	lnWR=0.7758ln(D2H)-3.1575	0.8282	Fraxinus mandschurica, Acer sp., Tilia sp. and so on	Cheng, T. R., Qin yan, M. A., Feng, Z. K., & Luo, X. (2007). Research on forest biomass in Xiaolong Mountains,Gansu Province. Journal of Beijing Forestry University, 29(1), 31-50.
